# Supplementary material for: An epigenetic small molecule screen to target abnormal nuclear morphology in human cells
Source: PubMed Central journal article supplement — Mol Biol Cell. 2022 May 12;33(6):ar45. doi: 10.1091/mbc.E21-10-0528 (PMC9265153; doi:10.1091/mbc.e21-10-0528), 2022-05-12

# Supplementary Materials

Molecular Biology of the Cell

Atanasova *et al.*

**Figure S1. Knockdown efficiency validation in MCF10A cells at 72 hours post transfection with siRNAs against *TP53* and *MTA2* target genes at three different final concentrations (12.5 nM, 25 nM and 50 nM).** Fold change in expression is normalized to *GAPDH* (internal control). Non-target siRNA treatment was used for comparison.

**Figure S2-S5. Assessment of log-normality assumptions for observed EFC ratio values across different treatments and gene knockdown conditions.** For each treatment and gene knockdown condition, the corresponding EFC ratio values (in log-scale; standardized) are summarized as histograms. A standard normal density curve is overlaid on each histogram to assess the corresponding normality assumption.

**Figure S6. Dose-dependent viability of screen-selected hits by functional group in *TP53*- and *MTA2*-depleted MCF10A cells.** Percent viability is normalized to the vehicle controls (DMSO) for each gene-depleted cell group. Graphs were created using GraphPad Prism 8 software with non-linear fit, variable slope.

**Figure S7. Dose-dependent viability of validated hits by functional group in breast and pancreas cancer cell lines with spontaneously irregular nuclei (MDA-MB-231 and PANC-1 respectively).** Percent viability is normalized to the vehicle control (DMSO). Graphs were created using GraphPad Prism 8 software with non-linear fit, variable slope.

**Figure S8 and S9. Counterparts of Figure 2 and Figure 3 respectively showing corresponding analyses of nuclear projected area.** (see legends of Figure 2 and 3 for more details)

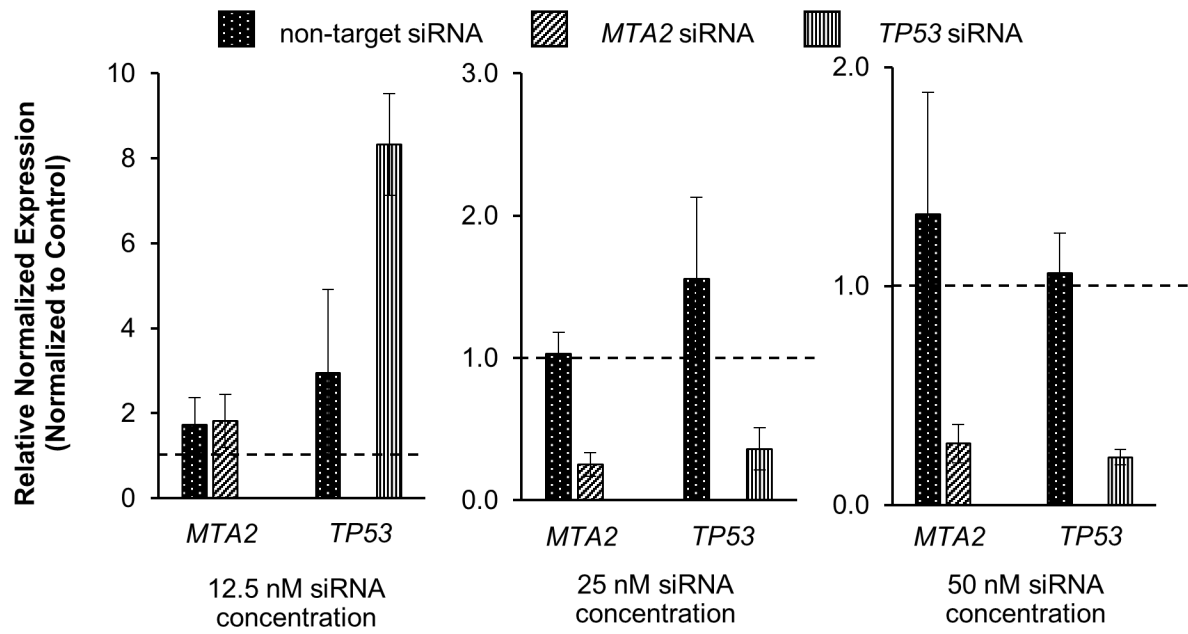

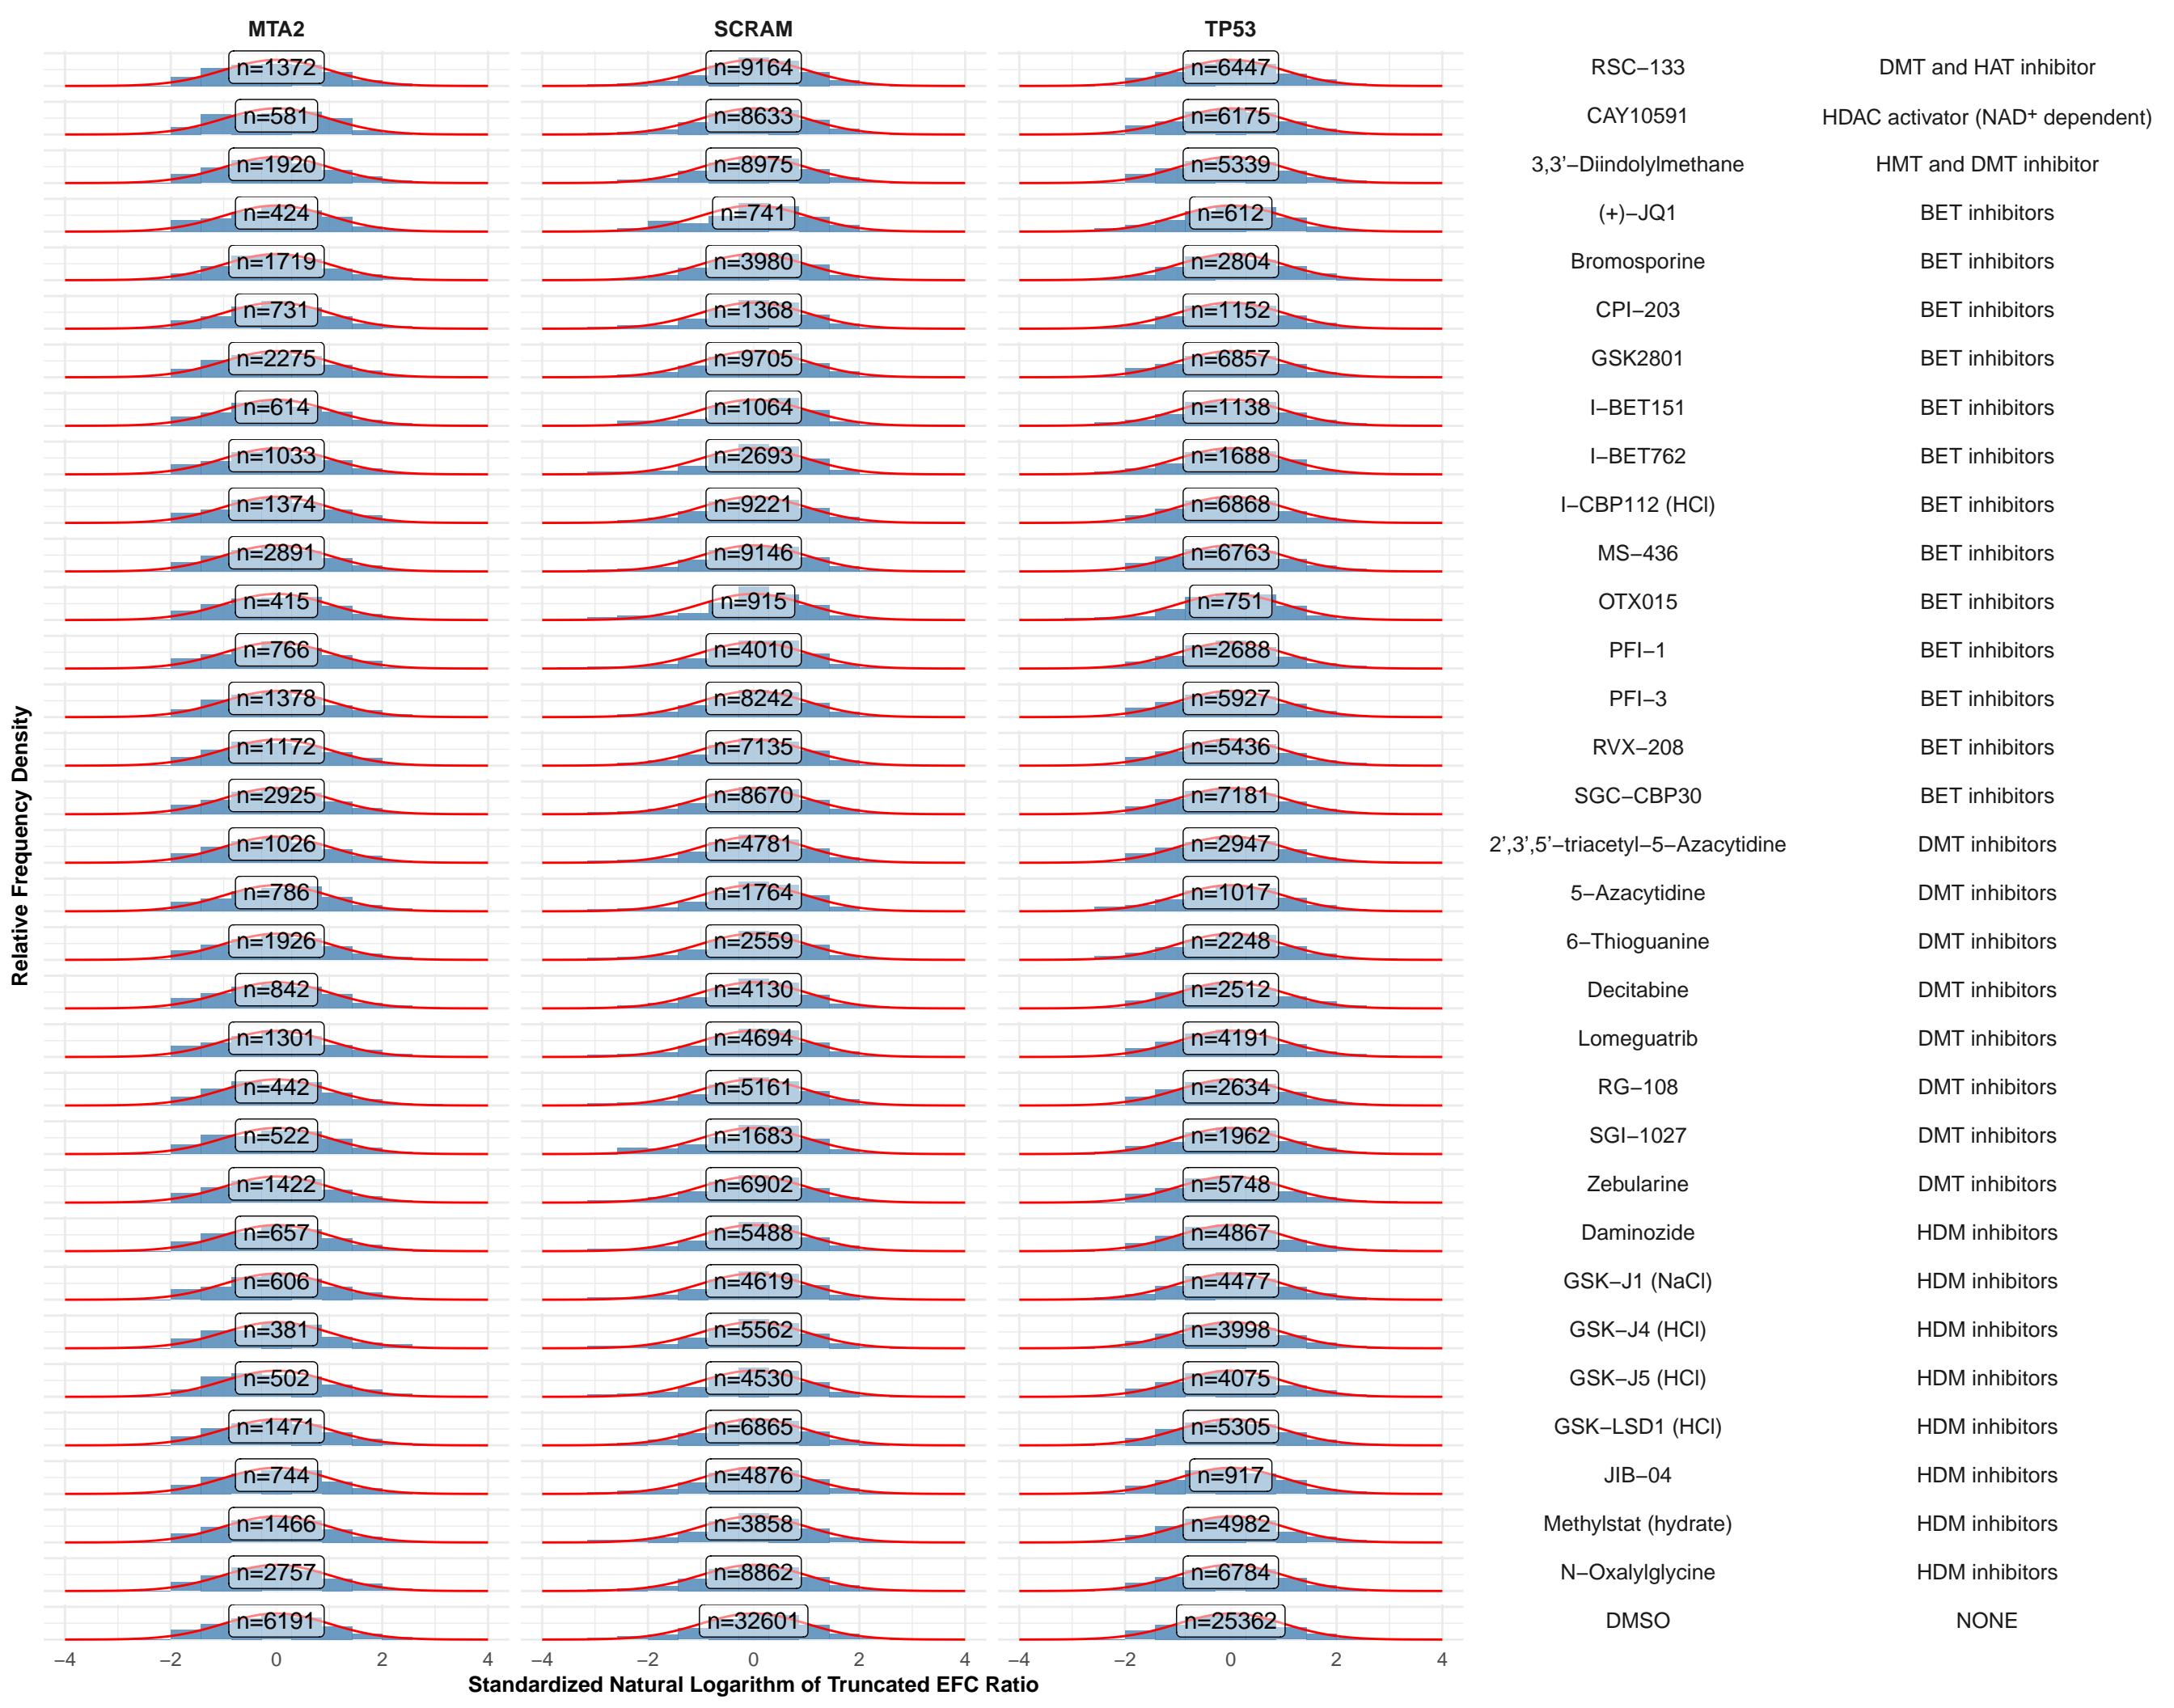

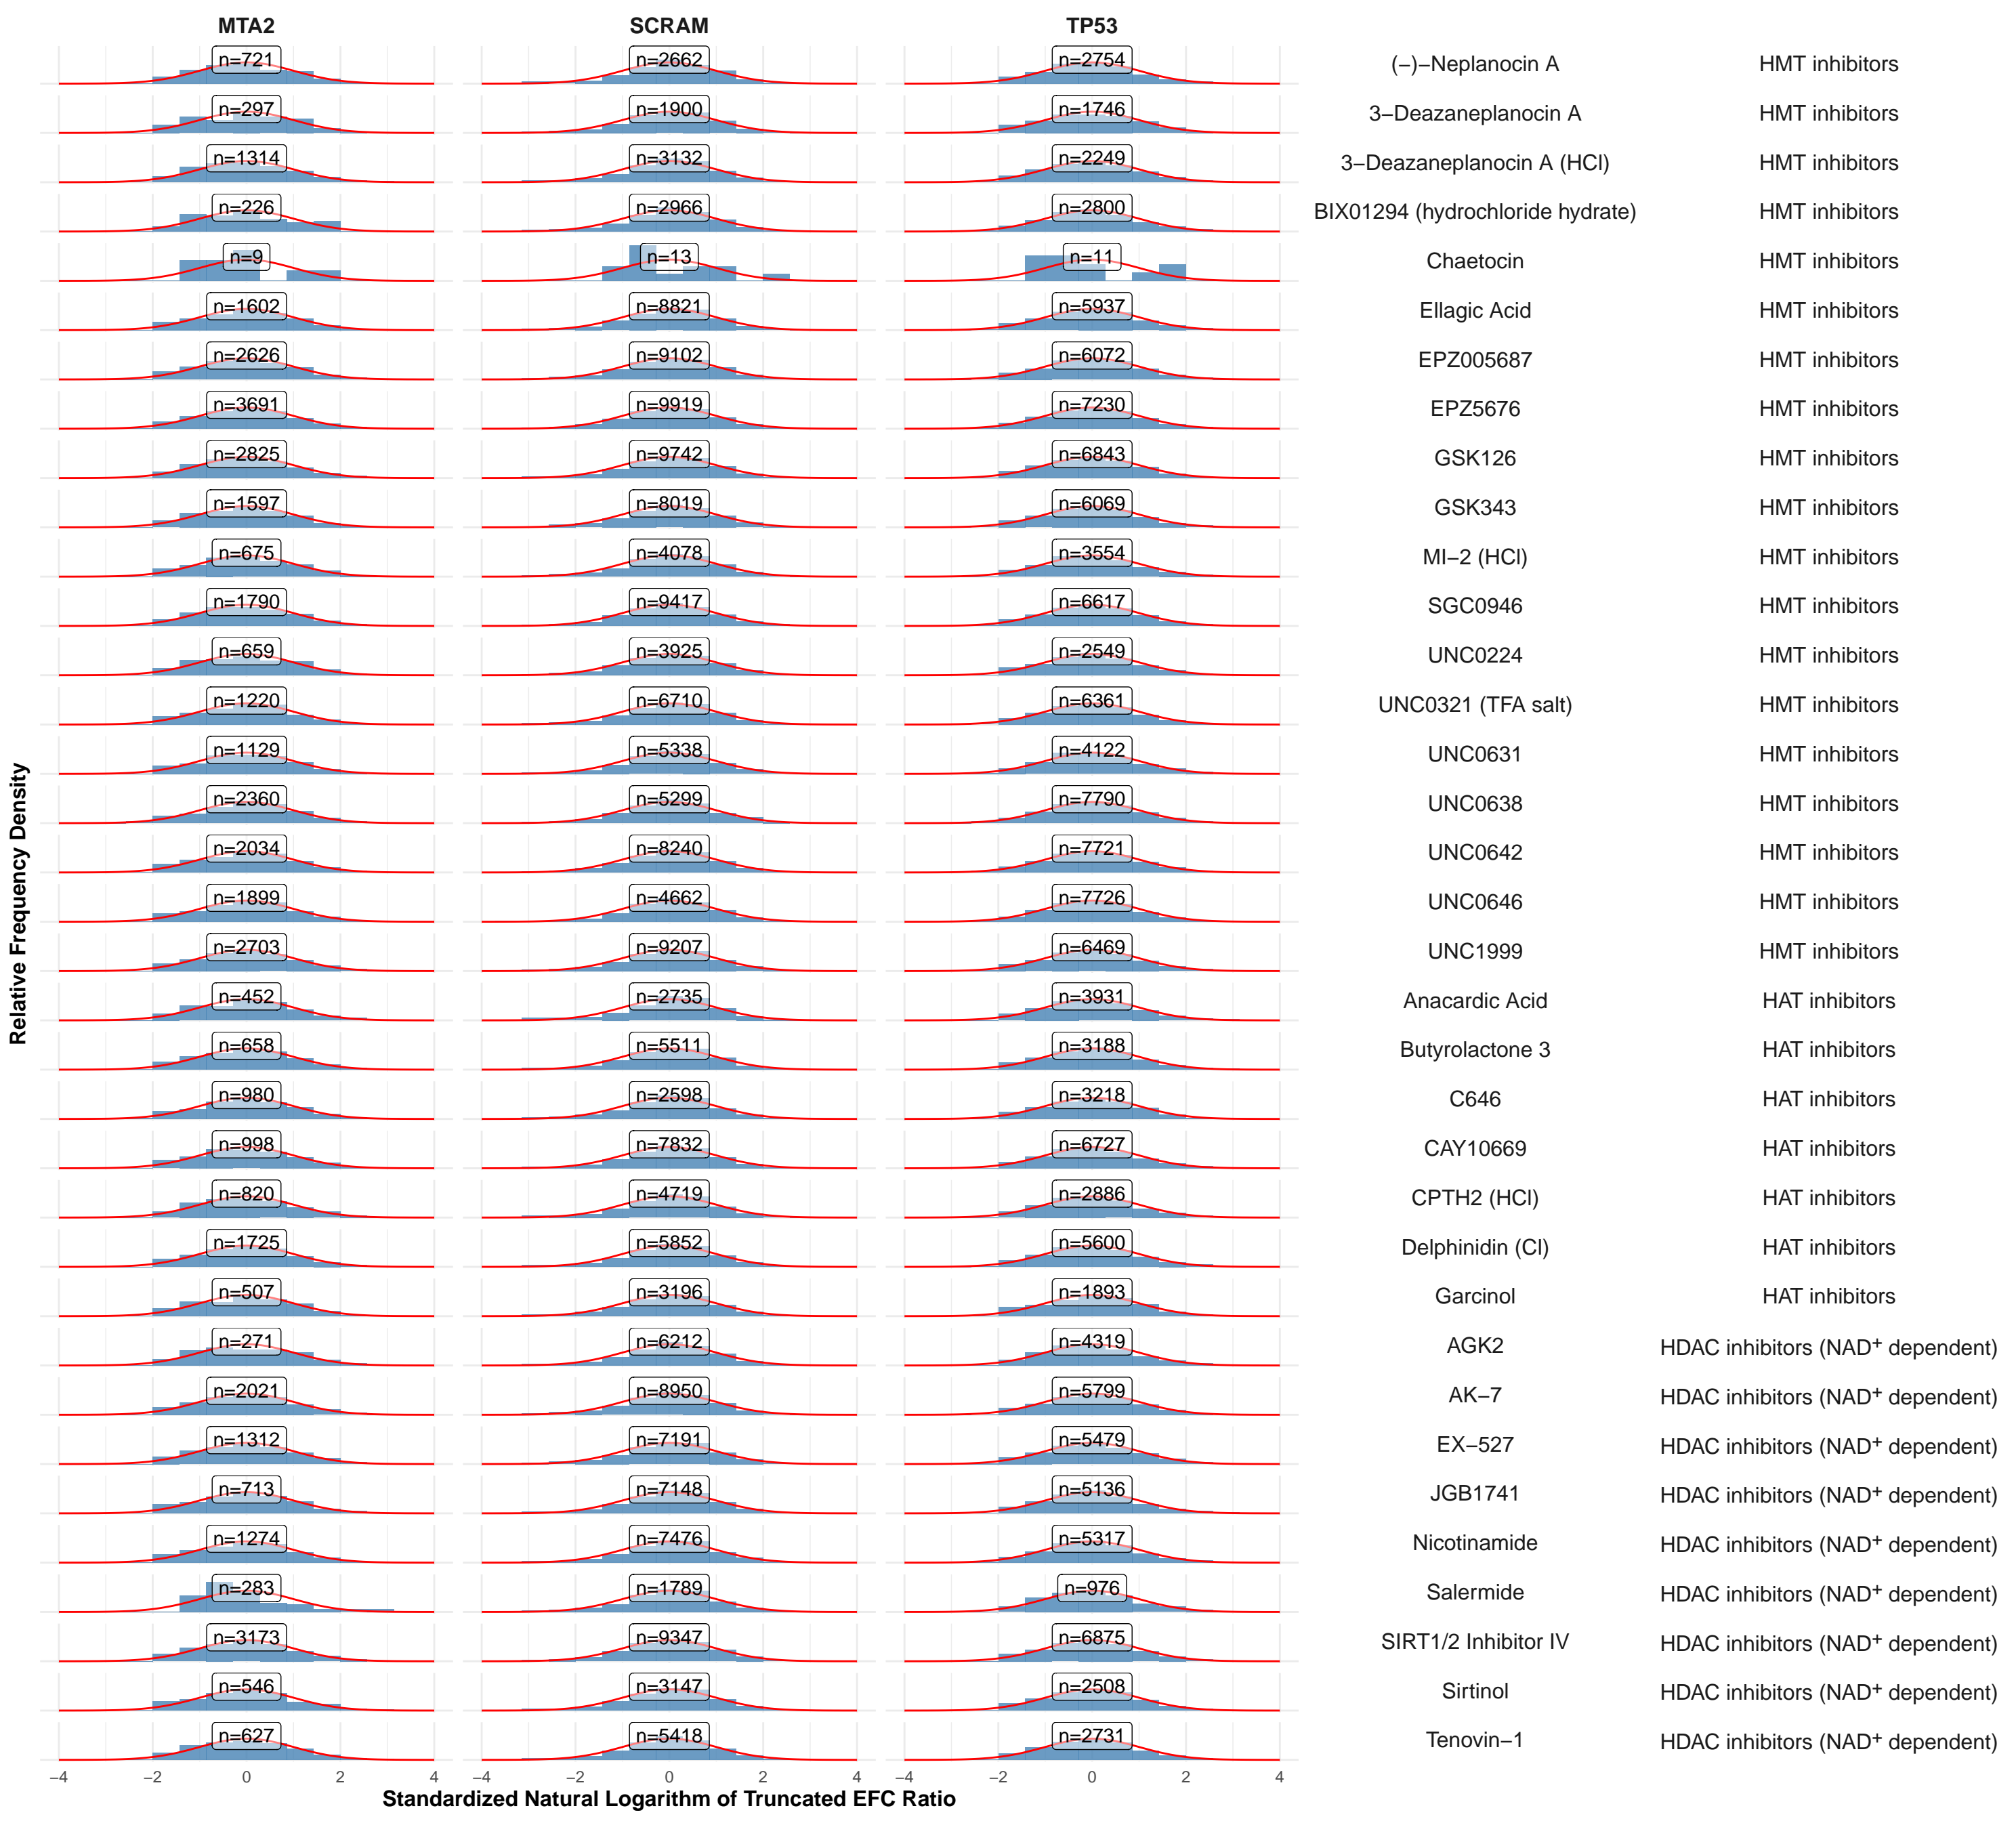

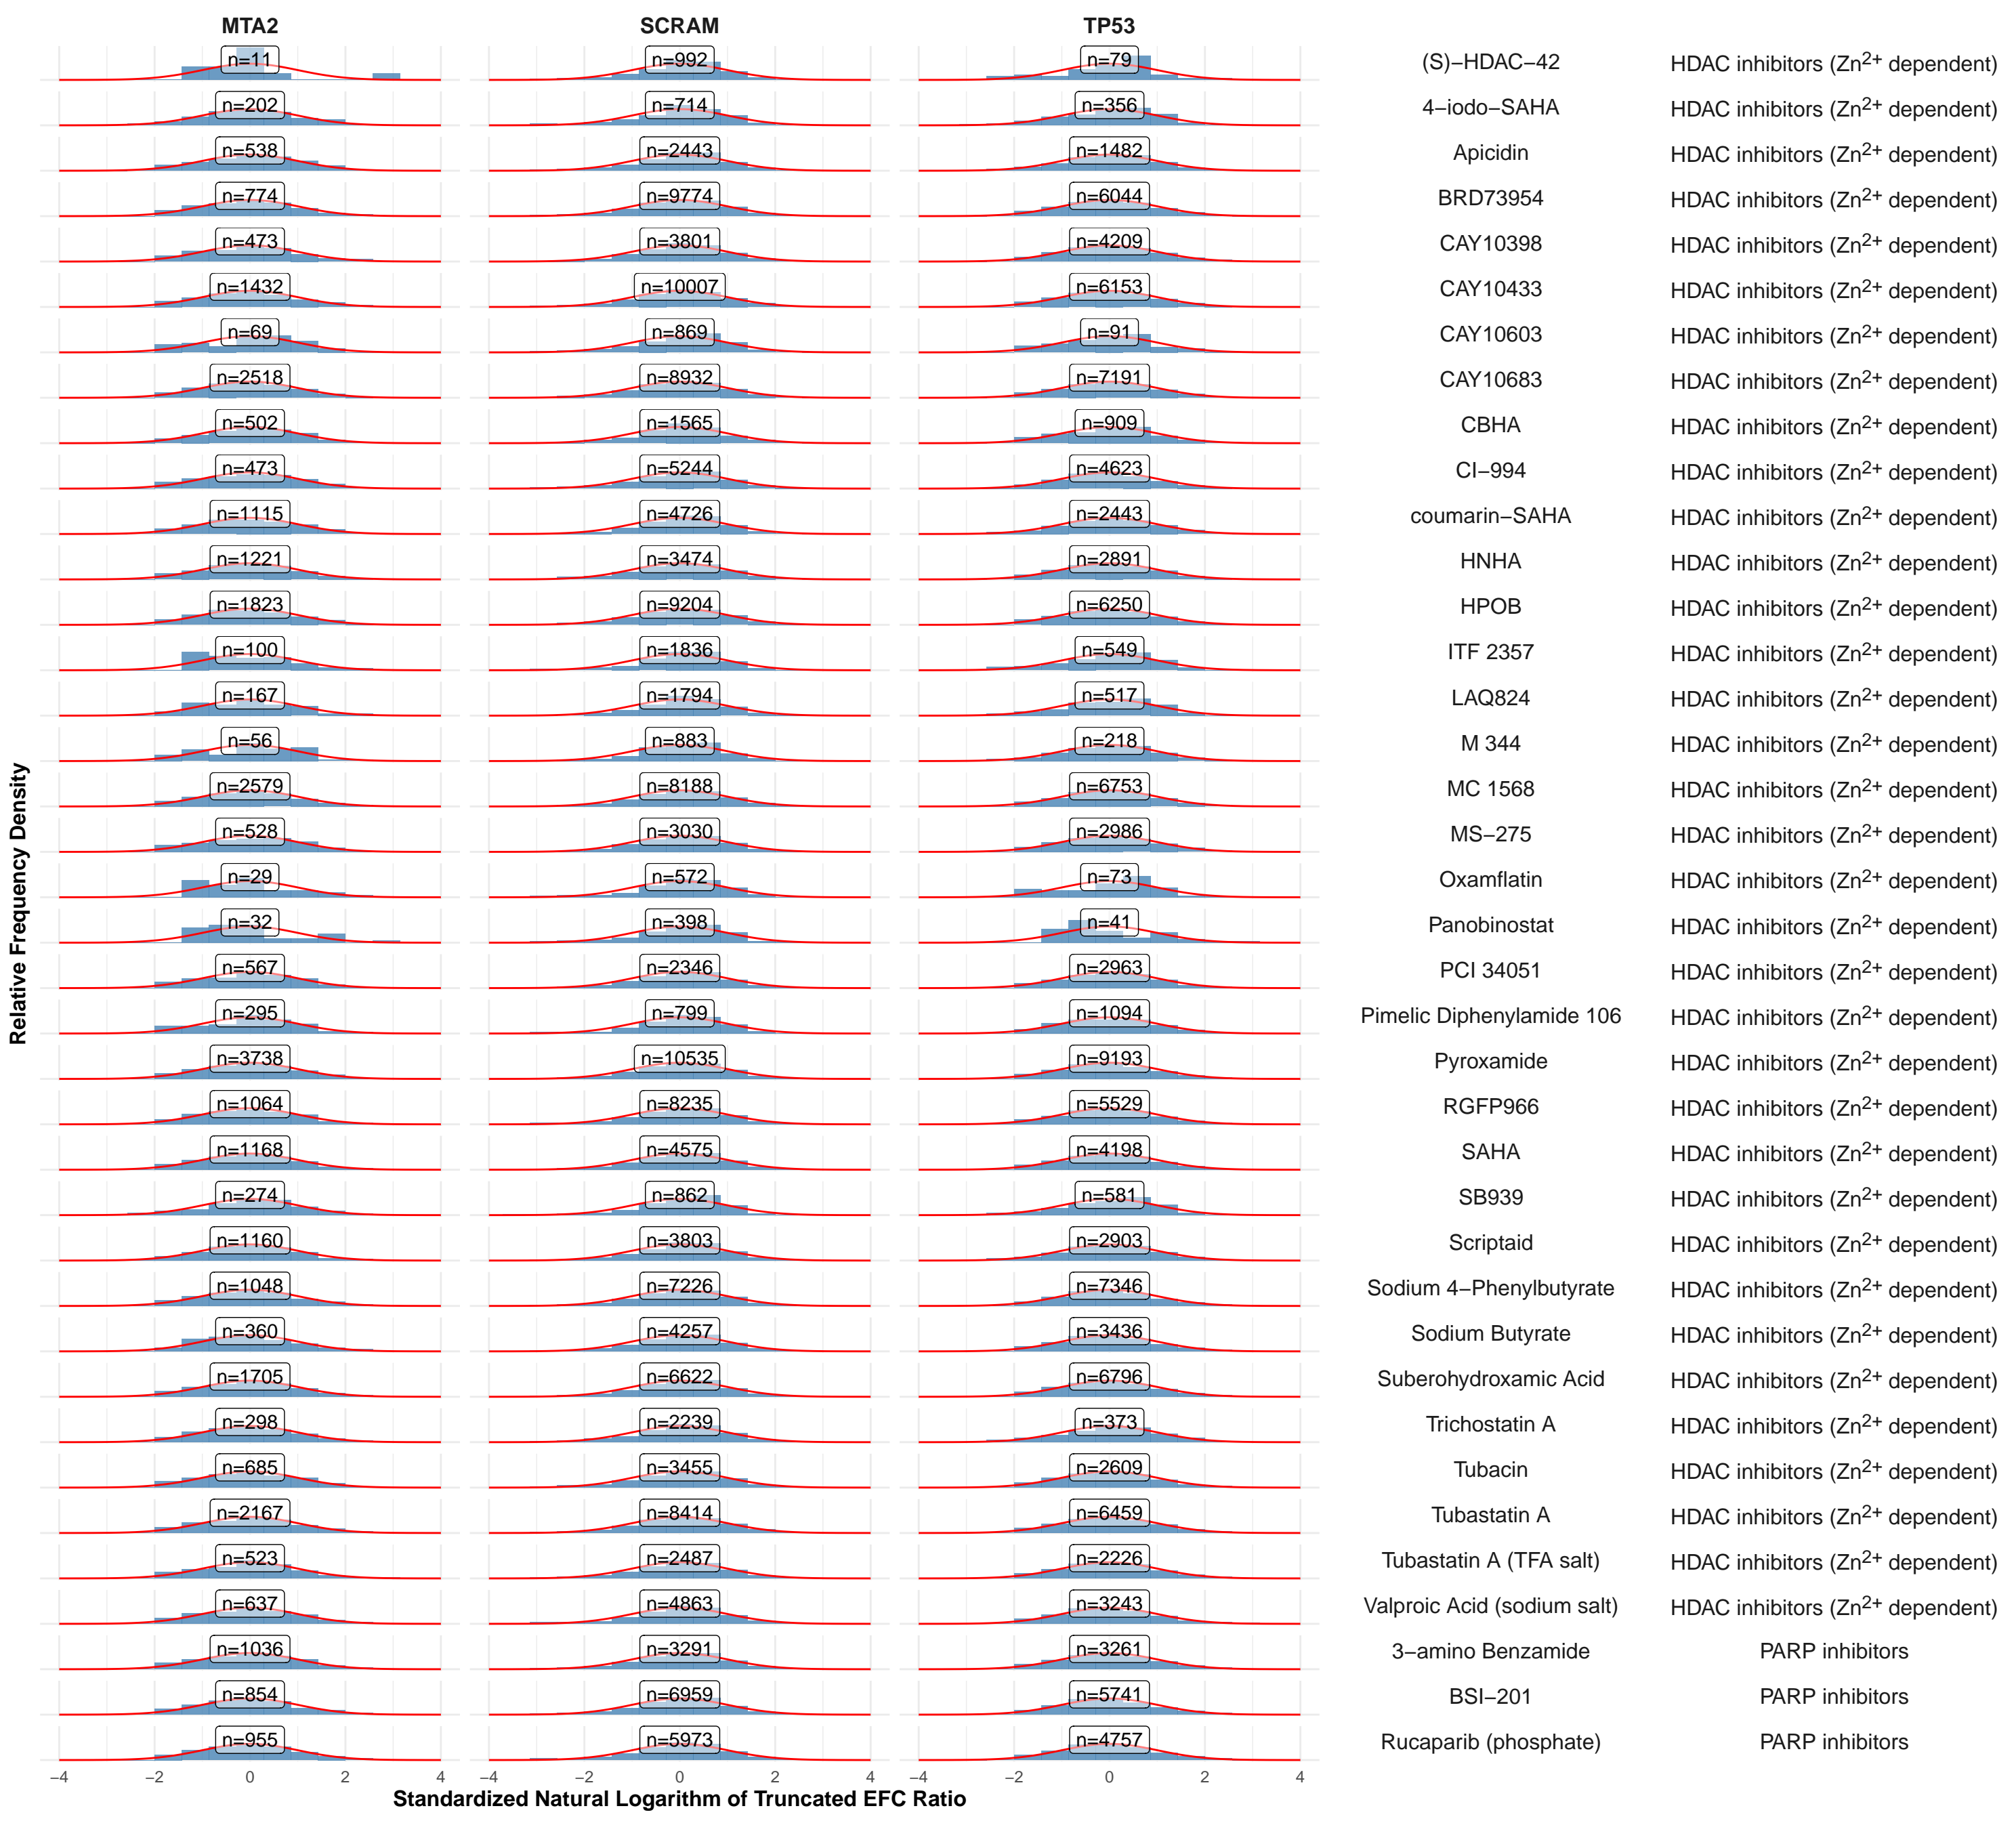

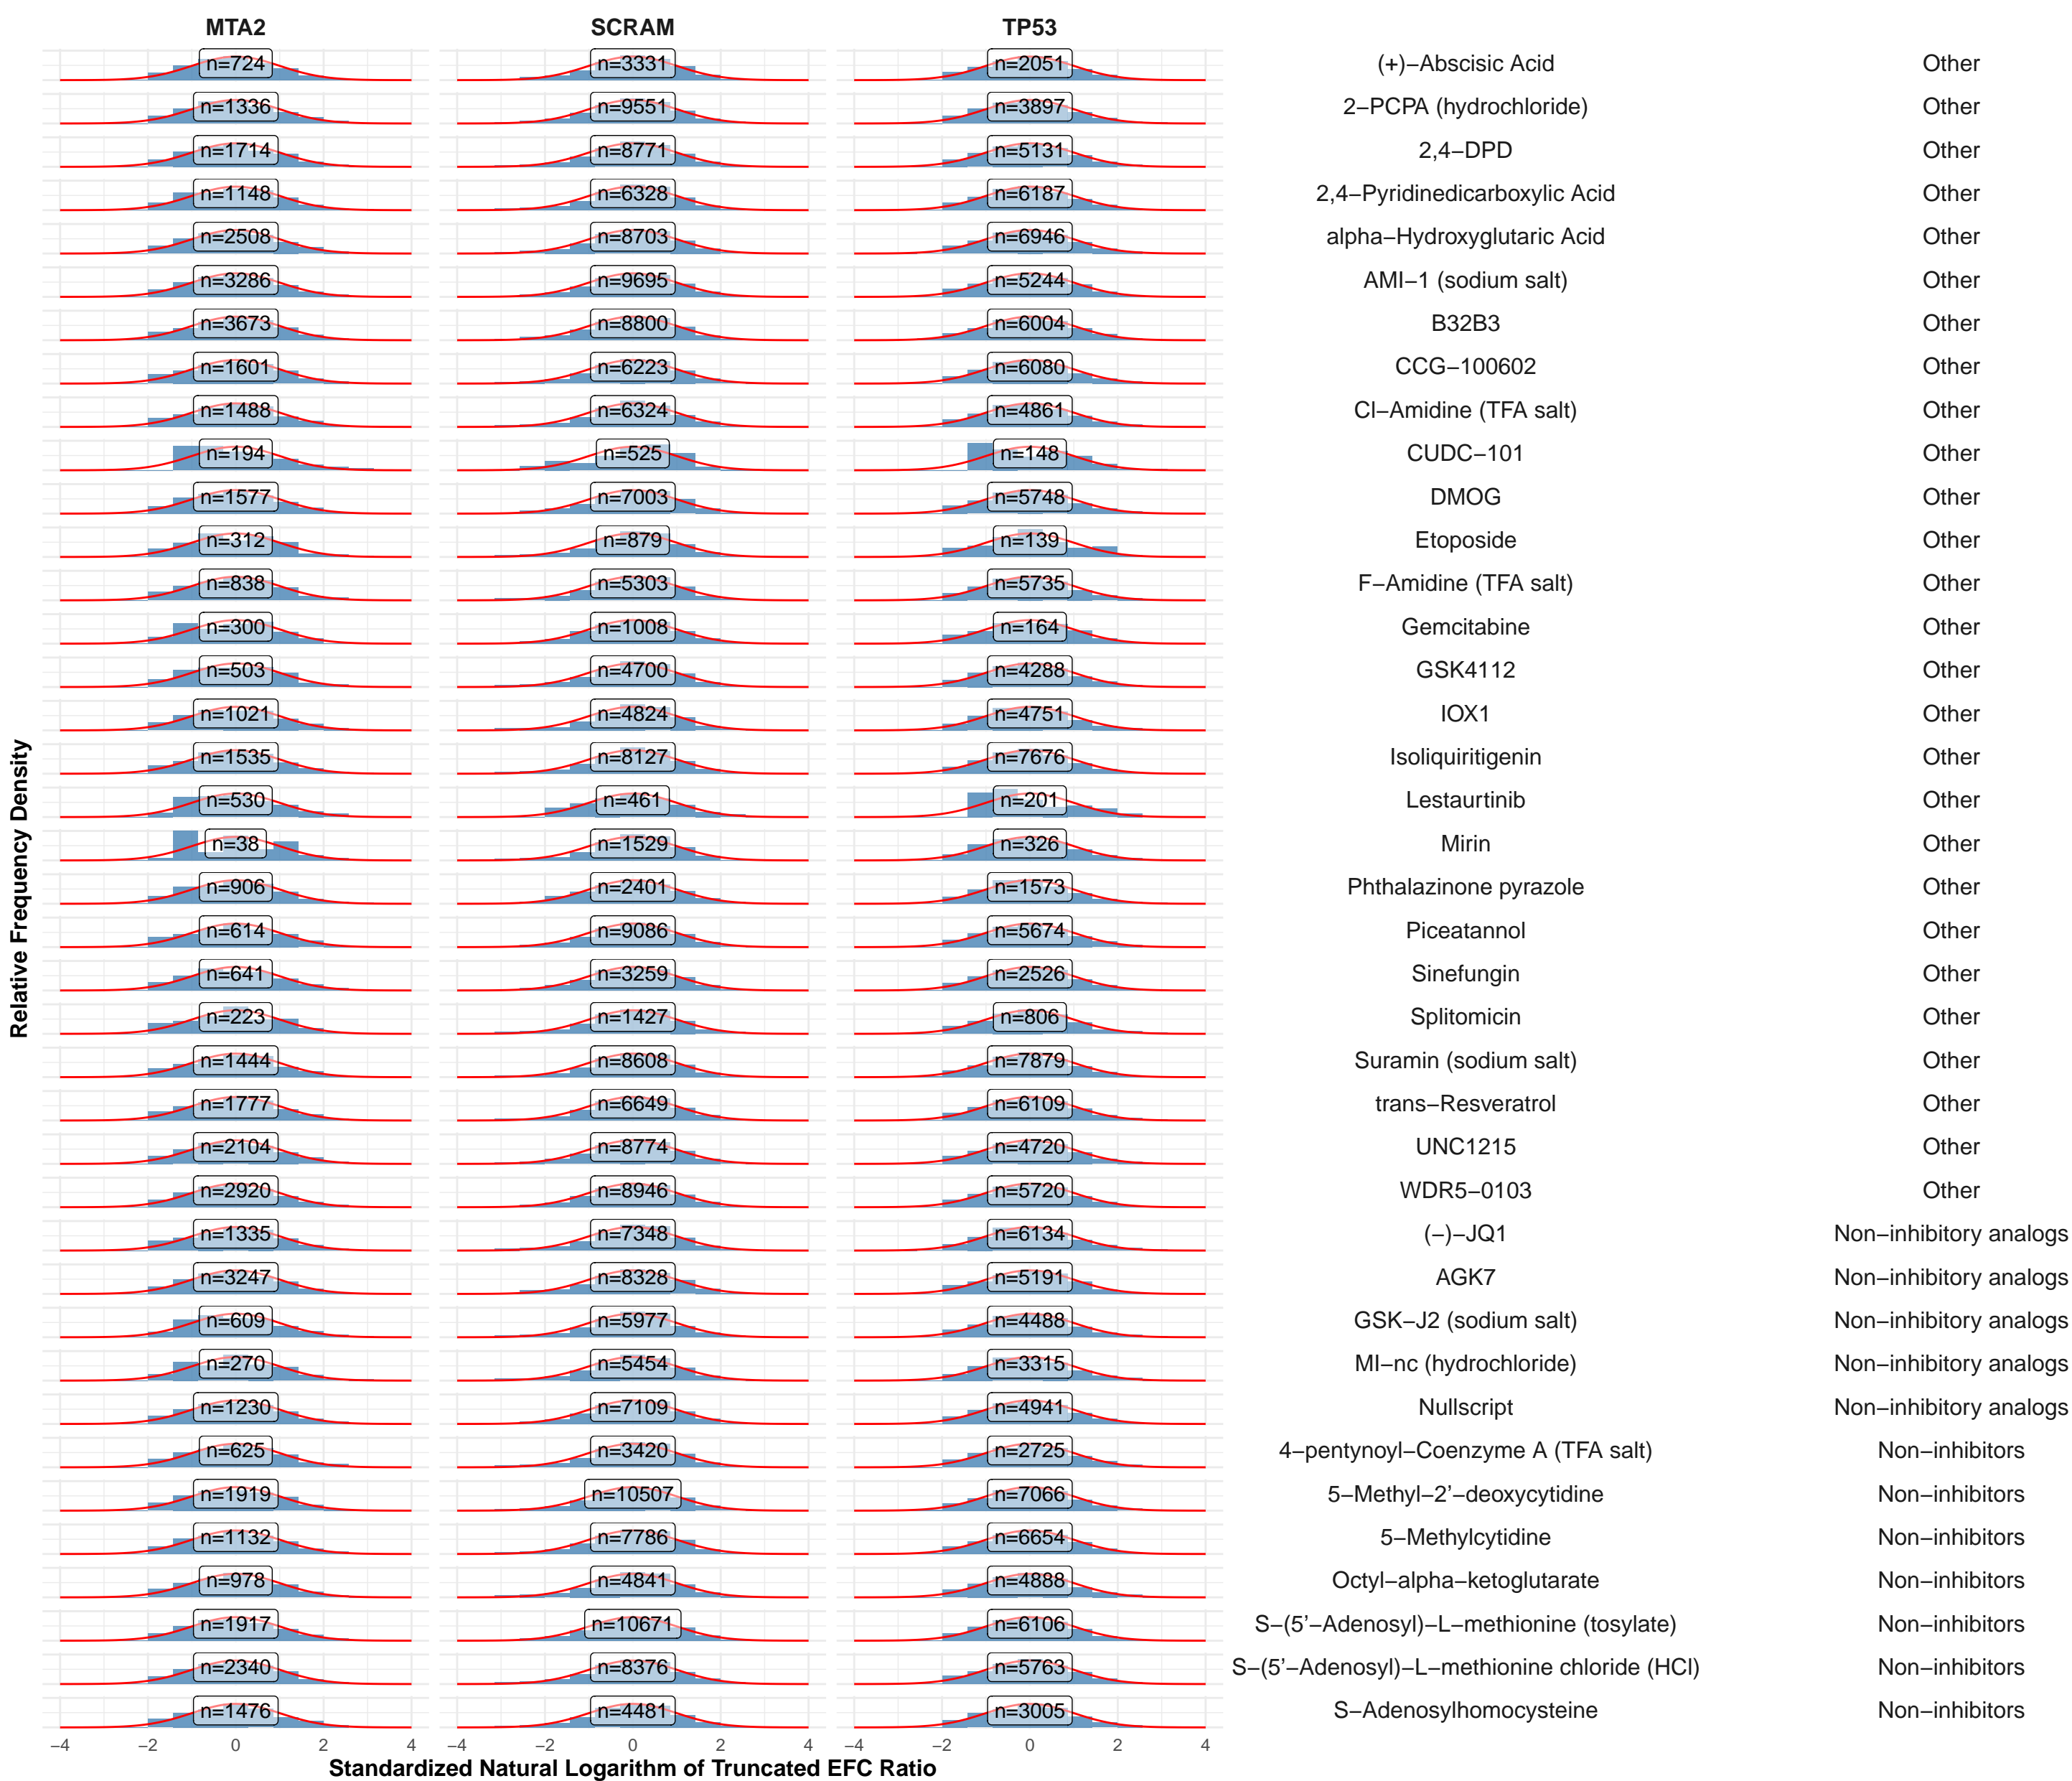

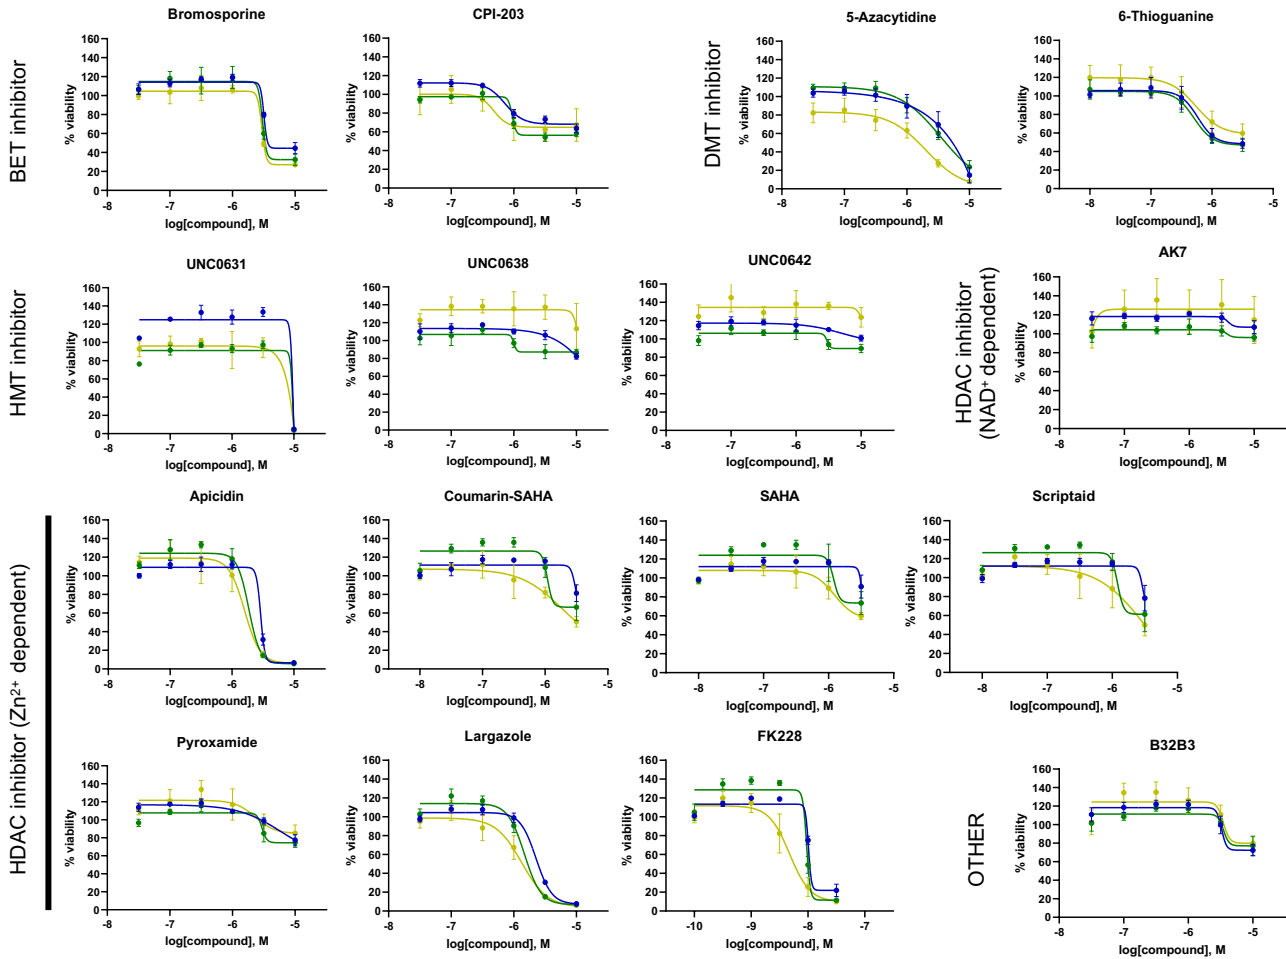

● non-target siRNA   
 ■ *TP53* siRNA   
 ▲ *MTA2* siRNA



## HDAC inhibitor (Zn<sup>2+</sup> dependent)

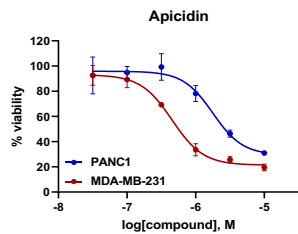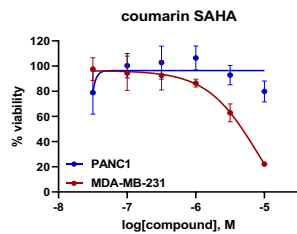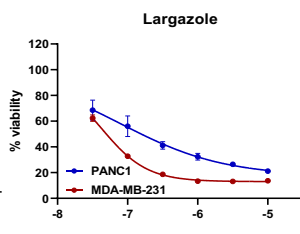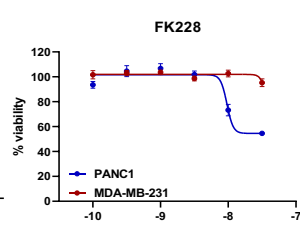

## HMT inhibitor

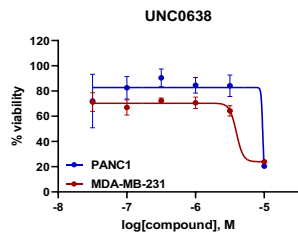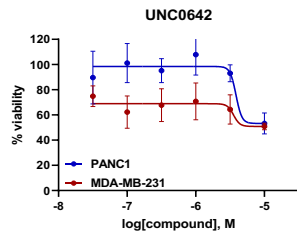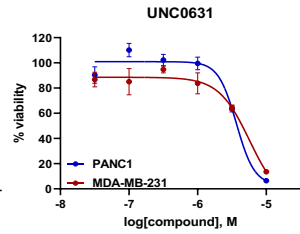

## DMT inhibitor

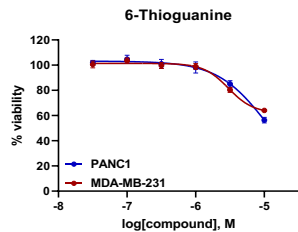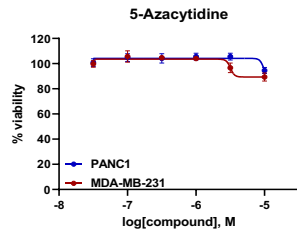

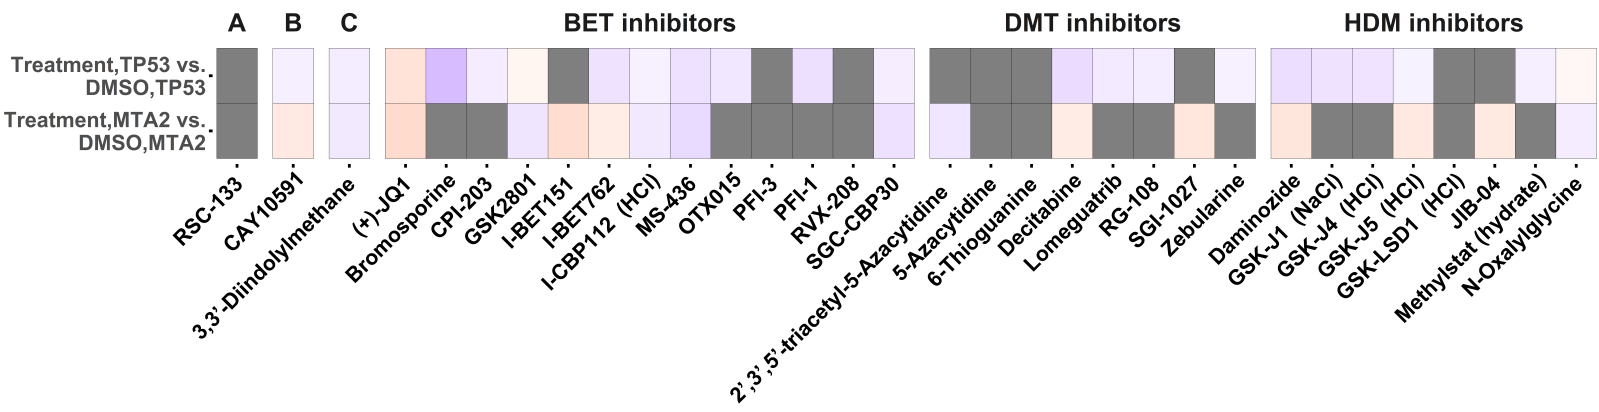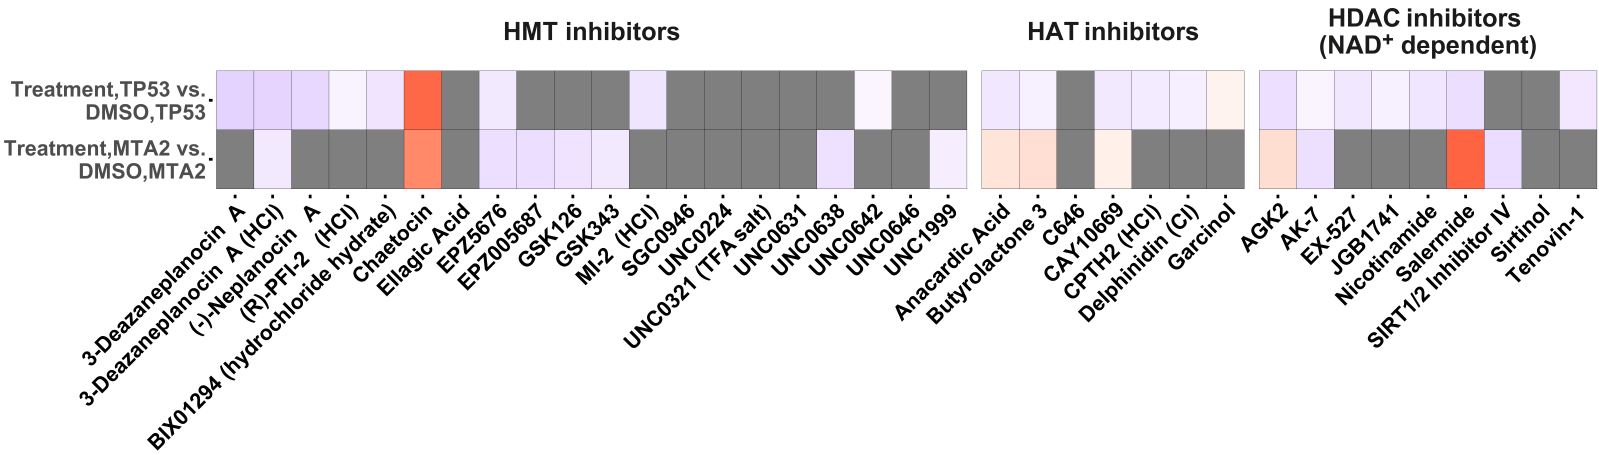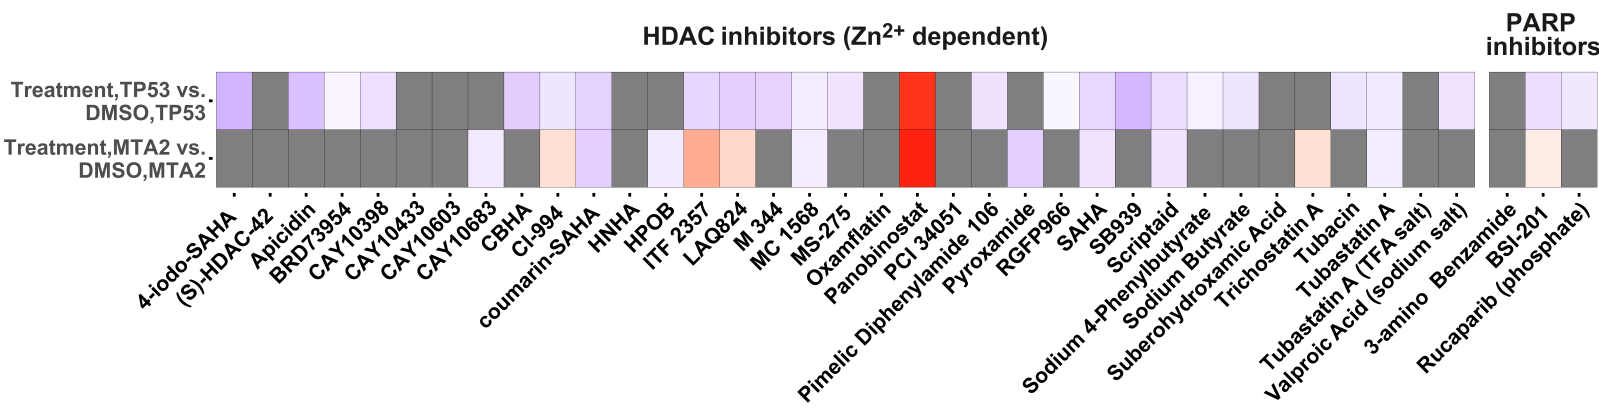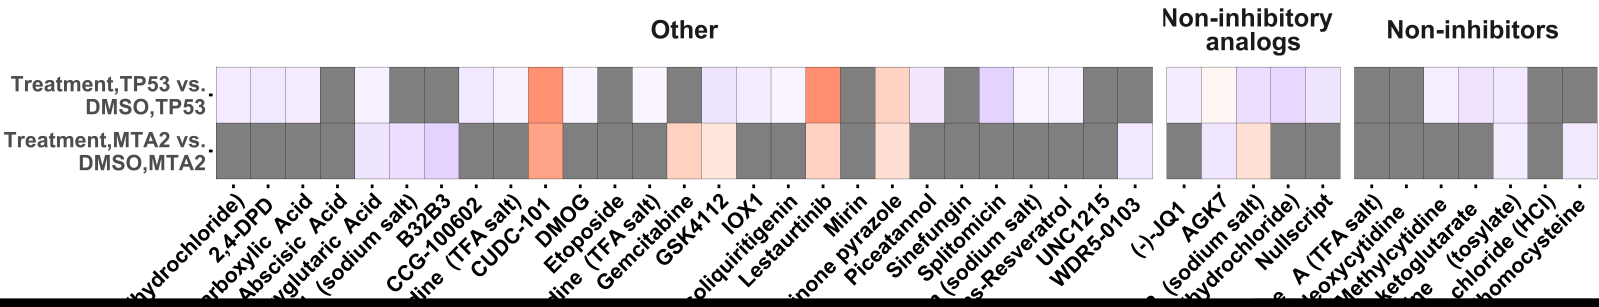

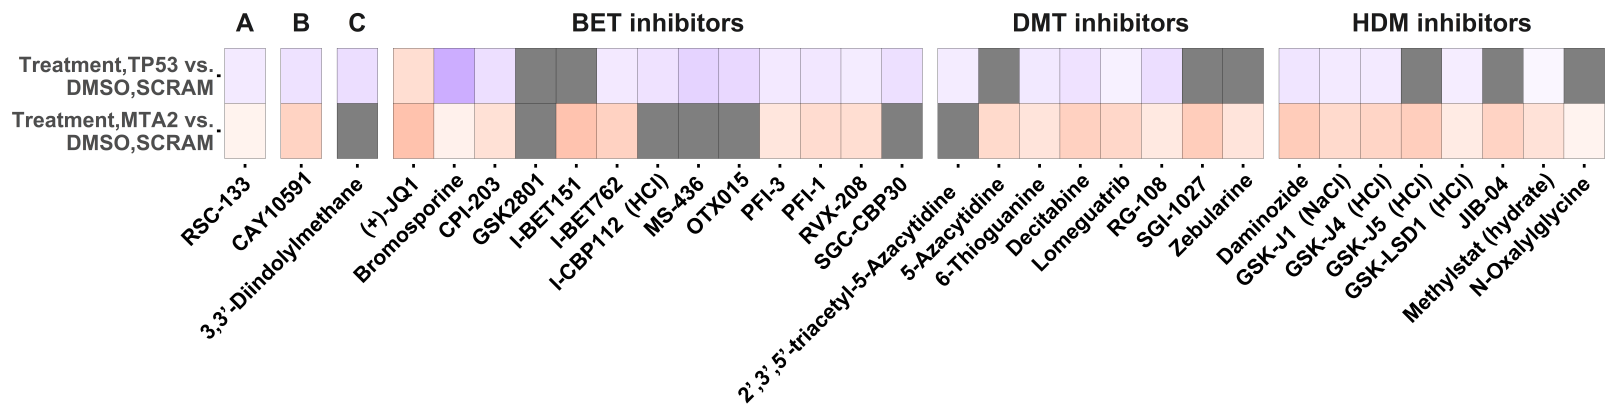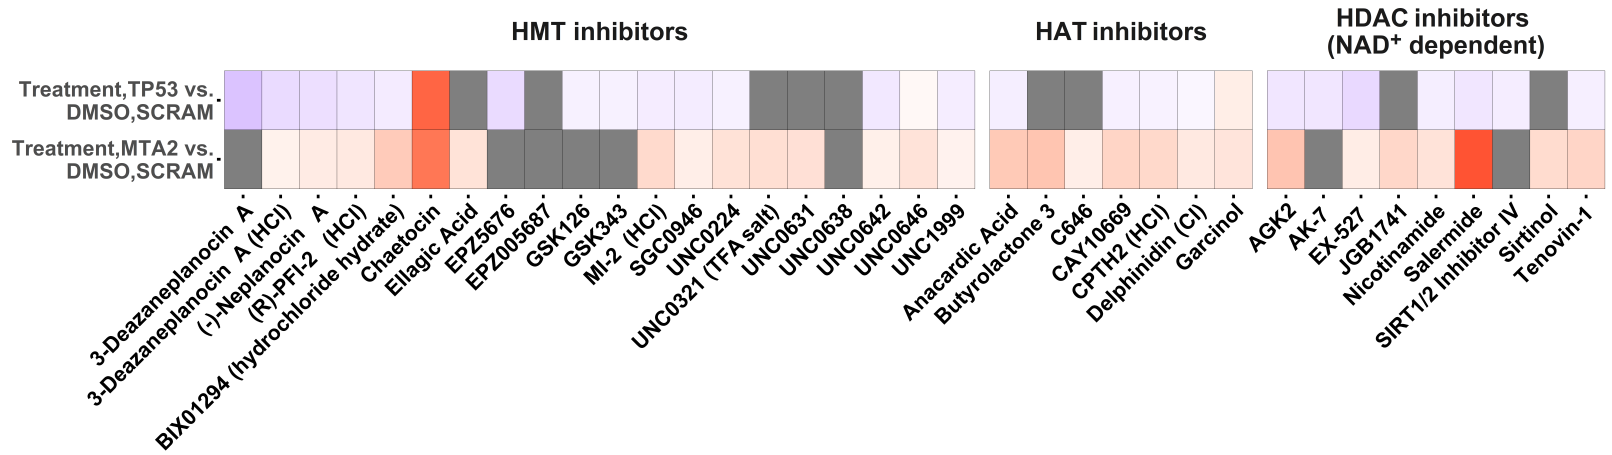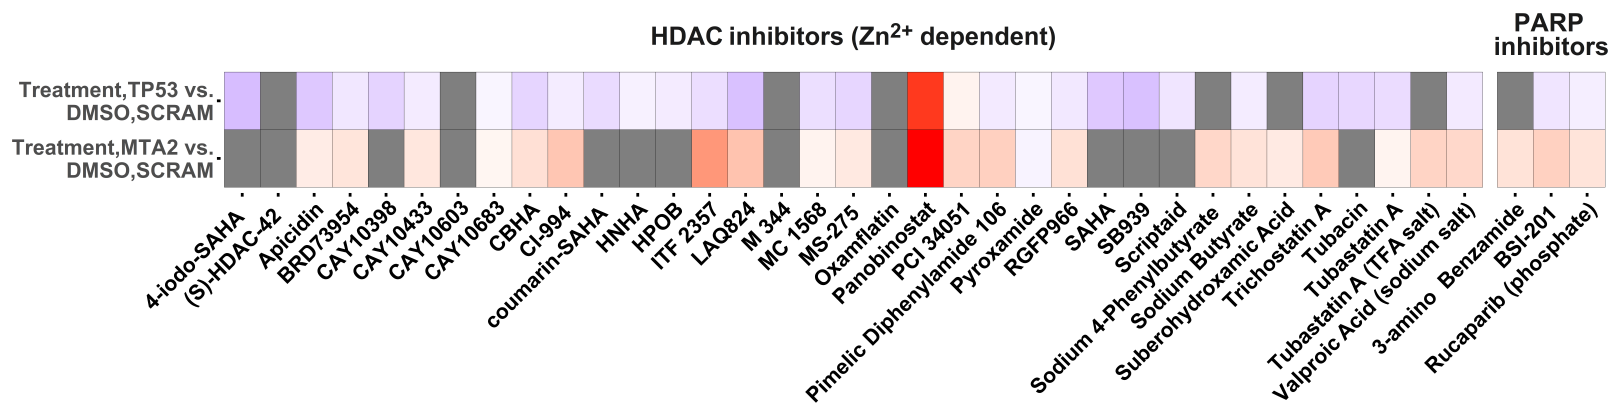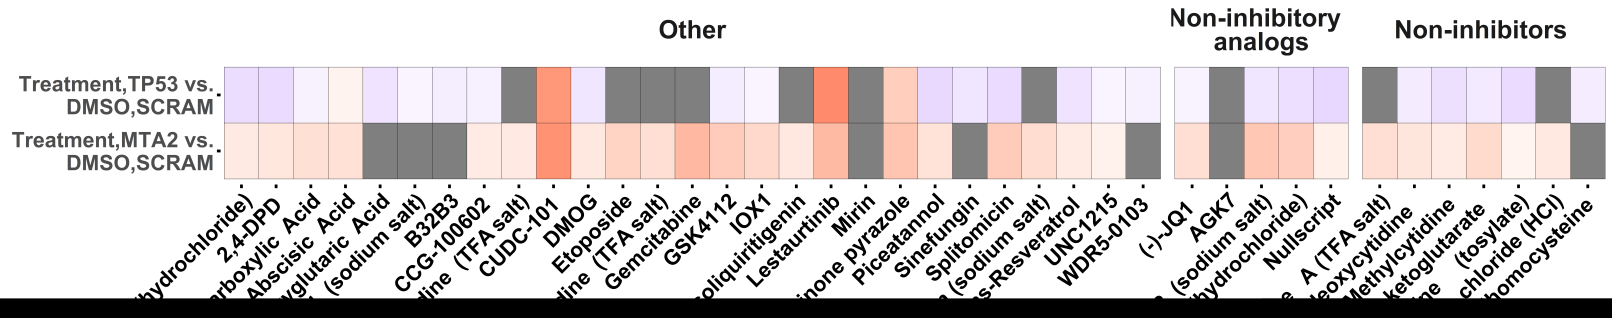

Supplement: mbc-33-ar45-s001.pdf [file mbc-33-ar45-s001.pdf]
